# Supplementary material for: Screening durum wheat cultivars for resistance traits against the stem-base pathogen Fusarium graminearum
Source: PeerJ journal article supplement (doi:10.7717/peerj.20105), 2025-11-13
Supplement: 96591S1FigStaffHC.pdf [file 96591S1FigStaffHC.pdf]

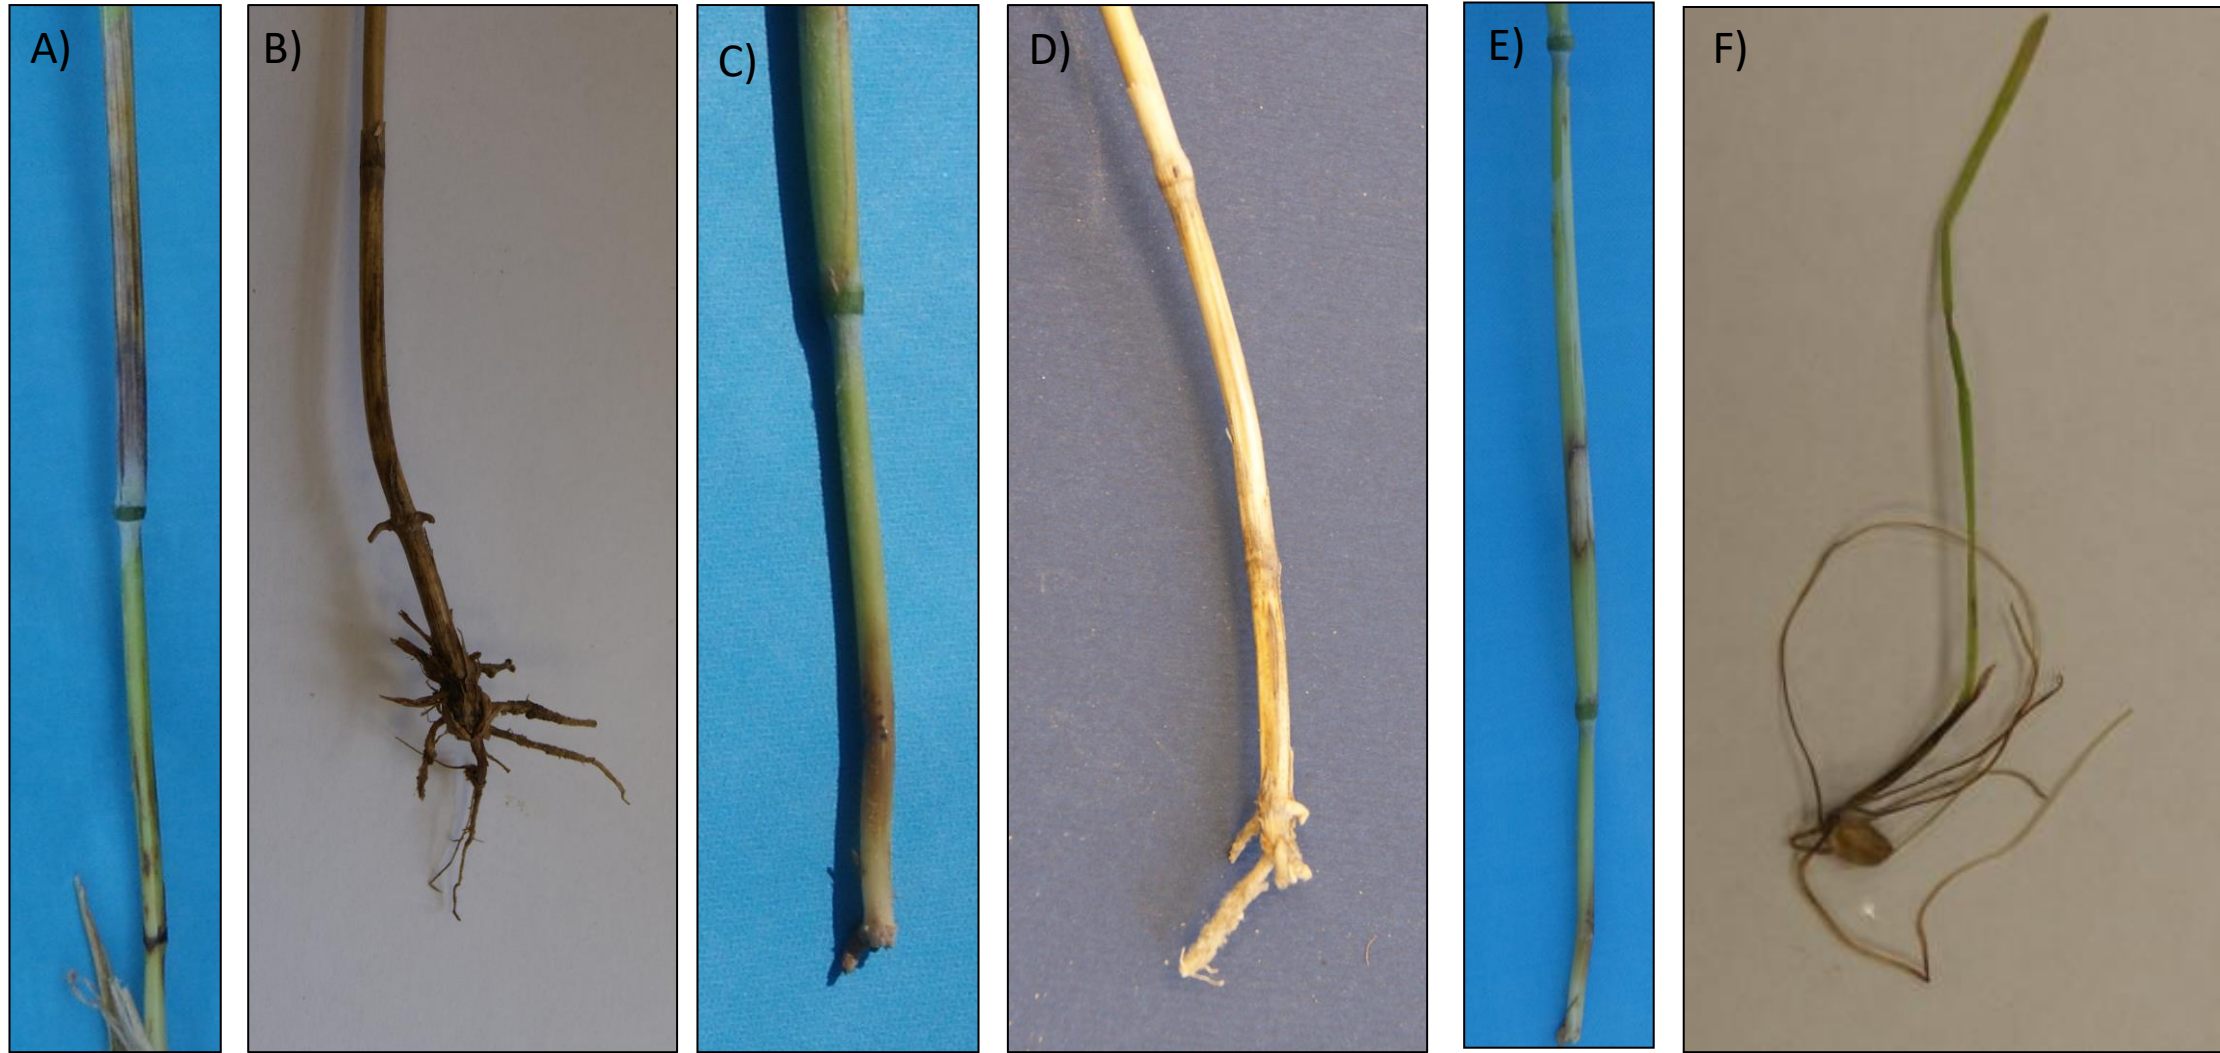

**Figure S1.** Symptoms A, B - Fusarium crown rot (FCR) (*Fusarium* spp.), C,D - eyespot (*Oculimacula* spp.), and E - sharp eyespot (*Rhizoctonia* spp.) in early (A,C,E) and late stages of development of durum wheat (A,C,E) and symptoms of infection of roots and coleoptile of durum wheat seedlings by *Fusarium graminearum*.
