# Supplementary material for: Screening durum wheat cultivars for resistance traits against the stem-base pathogen Fusarium graminearum
Source: PeerJ. 2025 Nov 13;13:e20105. doi: 10.7717/peerj.20105 (PMC12619947; doi:10.7717/peerj.20105)
Supplement: Supplemental Information 4 [file peerj-13-20105-s004.xlsx]

## Sheet: Arkusz2
Table S4. Prevalence and severity of infection in selected spring cultivars of durum wheat in the blotter test
	Cultivar	Fusarium graminearum	Fusarium poae	Fusarium avenaceum	Fusarium sprotrichiodes	Fusarium tricinctum		Alternaria alternata	Penicillium spp.	Cladosporium spp.	Acremonium spp.
64 ziarniaki	Tamadur	1	1	6	7	0		9	6	6	2
48 ziarniaków	Floradur	0	0	0	4	0		12	3	2	1
64 ziarniaków	Duragold	8	1	1	1	0		3	3	1	8
64 ziarniaków	Duranegra	5	2	1	6	3		9	6	4	0
48 ziarniaków	Durasol	3	0	0	7	0		3	14	5	5
	Fusarium on grain of Triticum durum (%)
	Cultivar	Fusarium graminearum	Fusarium poae	Fusarium avenaceum	Fusarium sprotrichiodes	Fusarium tricinctum	Sum Fusarium	Alternaria alternata	Penicillium spp.	Cladosporium spp.	Acremonium spp.
	Tamadur	1.6	1.6	9.4	10.9	0	23.4	14.1	9.4	9.4	3.1
	Floradur	0	0	0	8.3	0	8.3	25	6.3	4.2	2.1
	Duragold	12.5	1.6	1.6	1.6	0	17.2	4.7	4.7	1.6	12.5
	Duranegra	7.8	3.2	1.6	9.4	4.4	26.3	14.1	9.4	6.3	0
	Durasol	6.25	0	0	14.6	0	20.8	6.3	29.2	10.4	10.4
